# Supplementary figures and images for: A novel electrochemical exfoliation route to tailor the graphene bandgap through silicon incorporation: semi-metallic to semiconducting transition
Source: Royal Society of Chemistry journal article supplement (doi:10.1039/d5na01111f), 2026-04-10

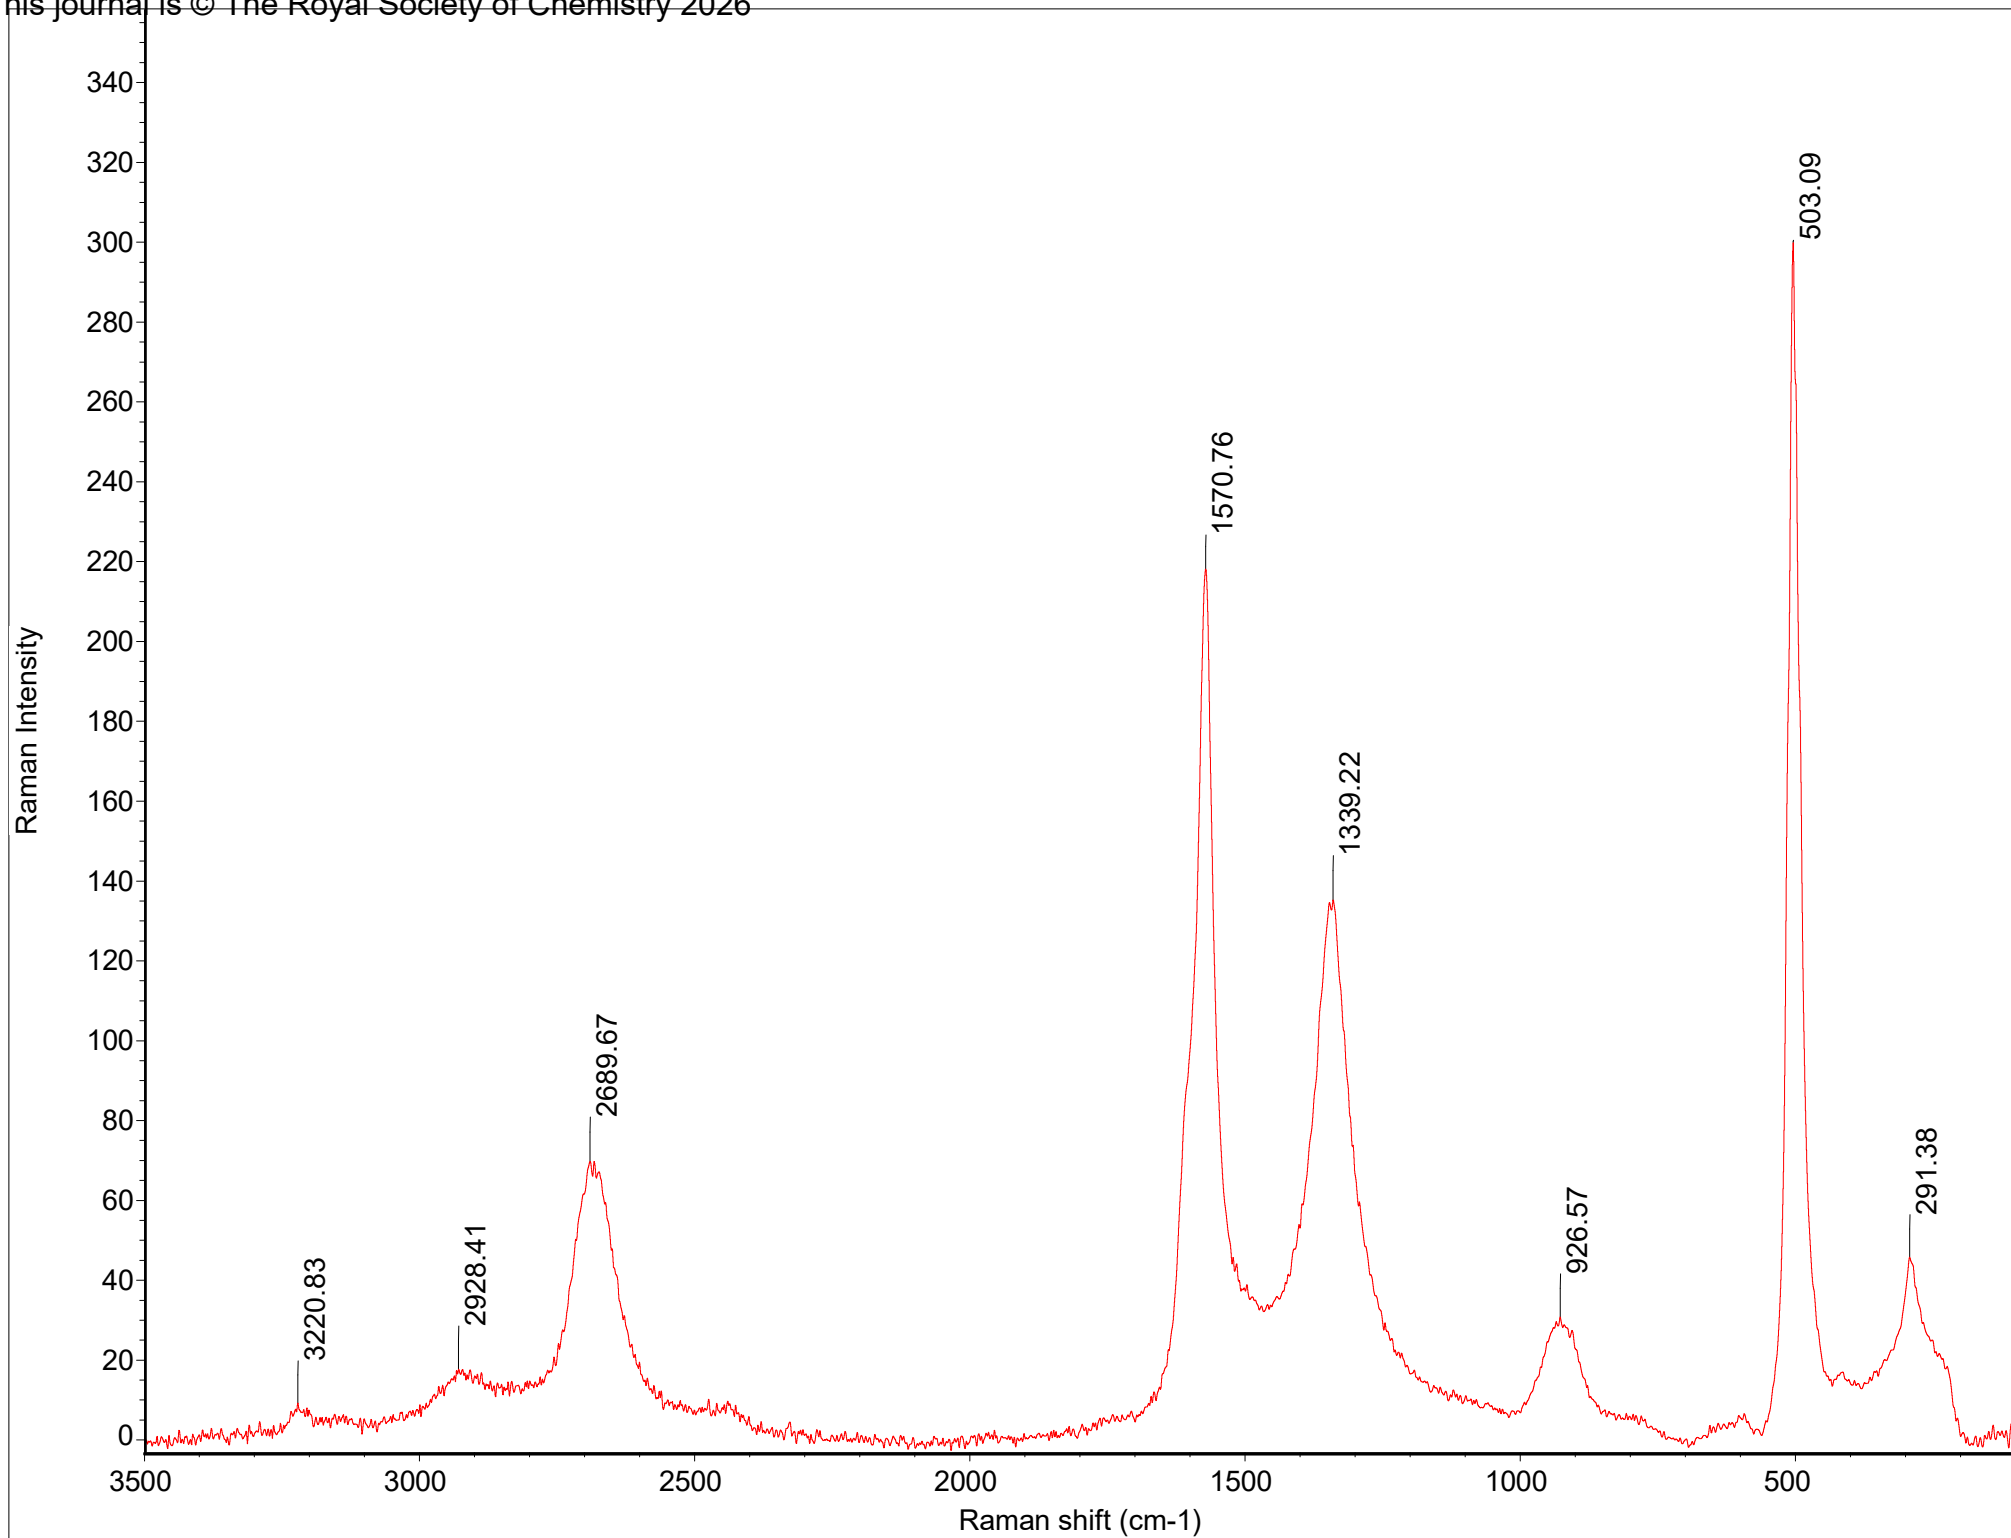

Supplement: d5na01111f2.pdf [file d5na01111f2.pdf]

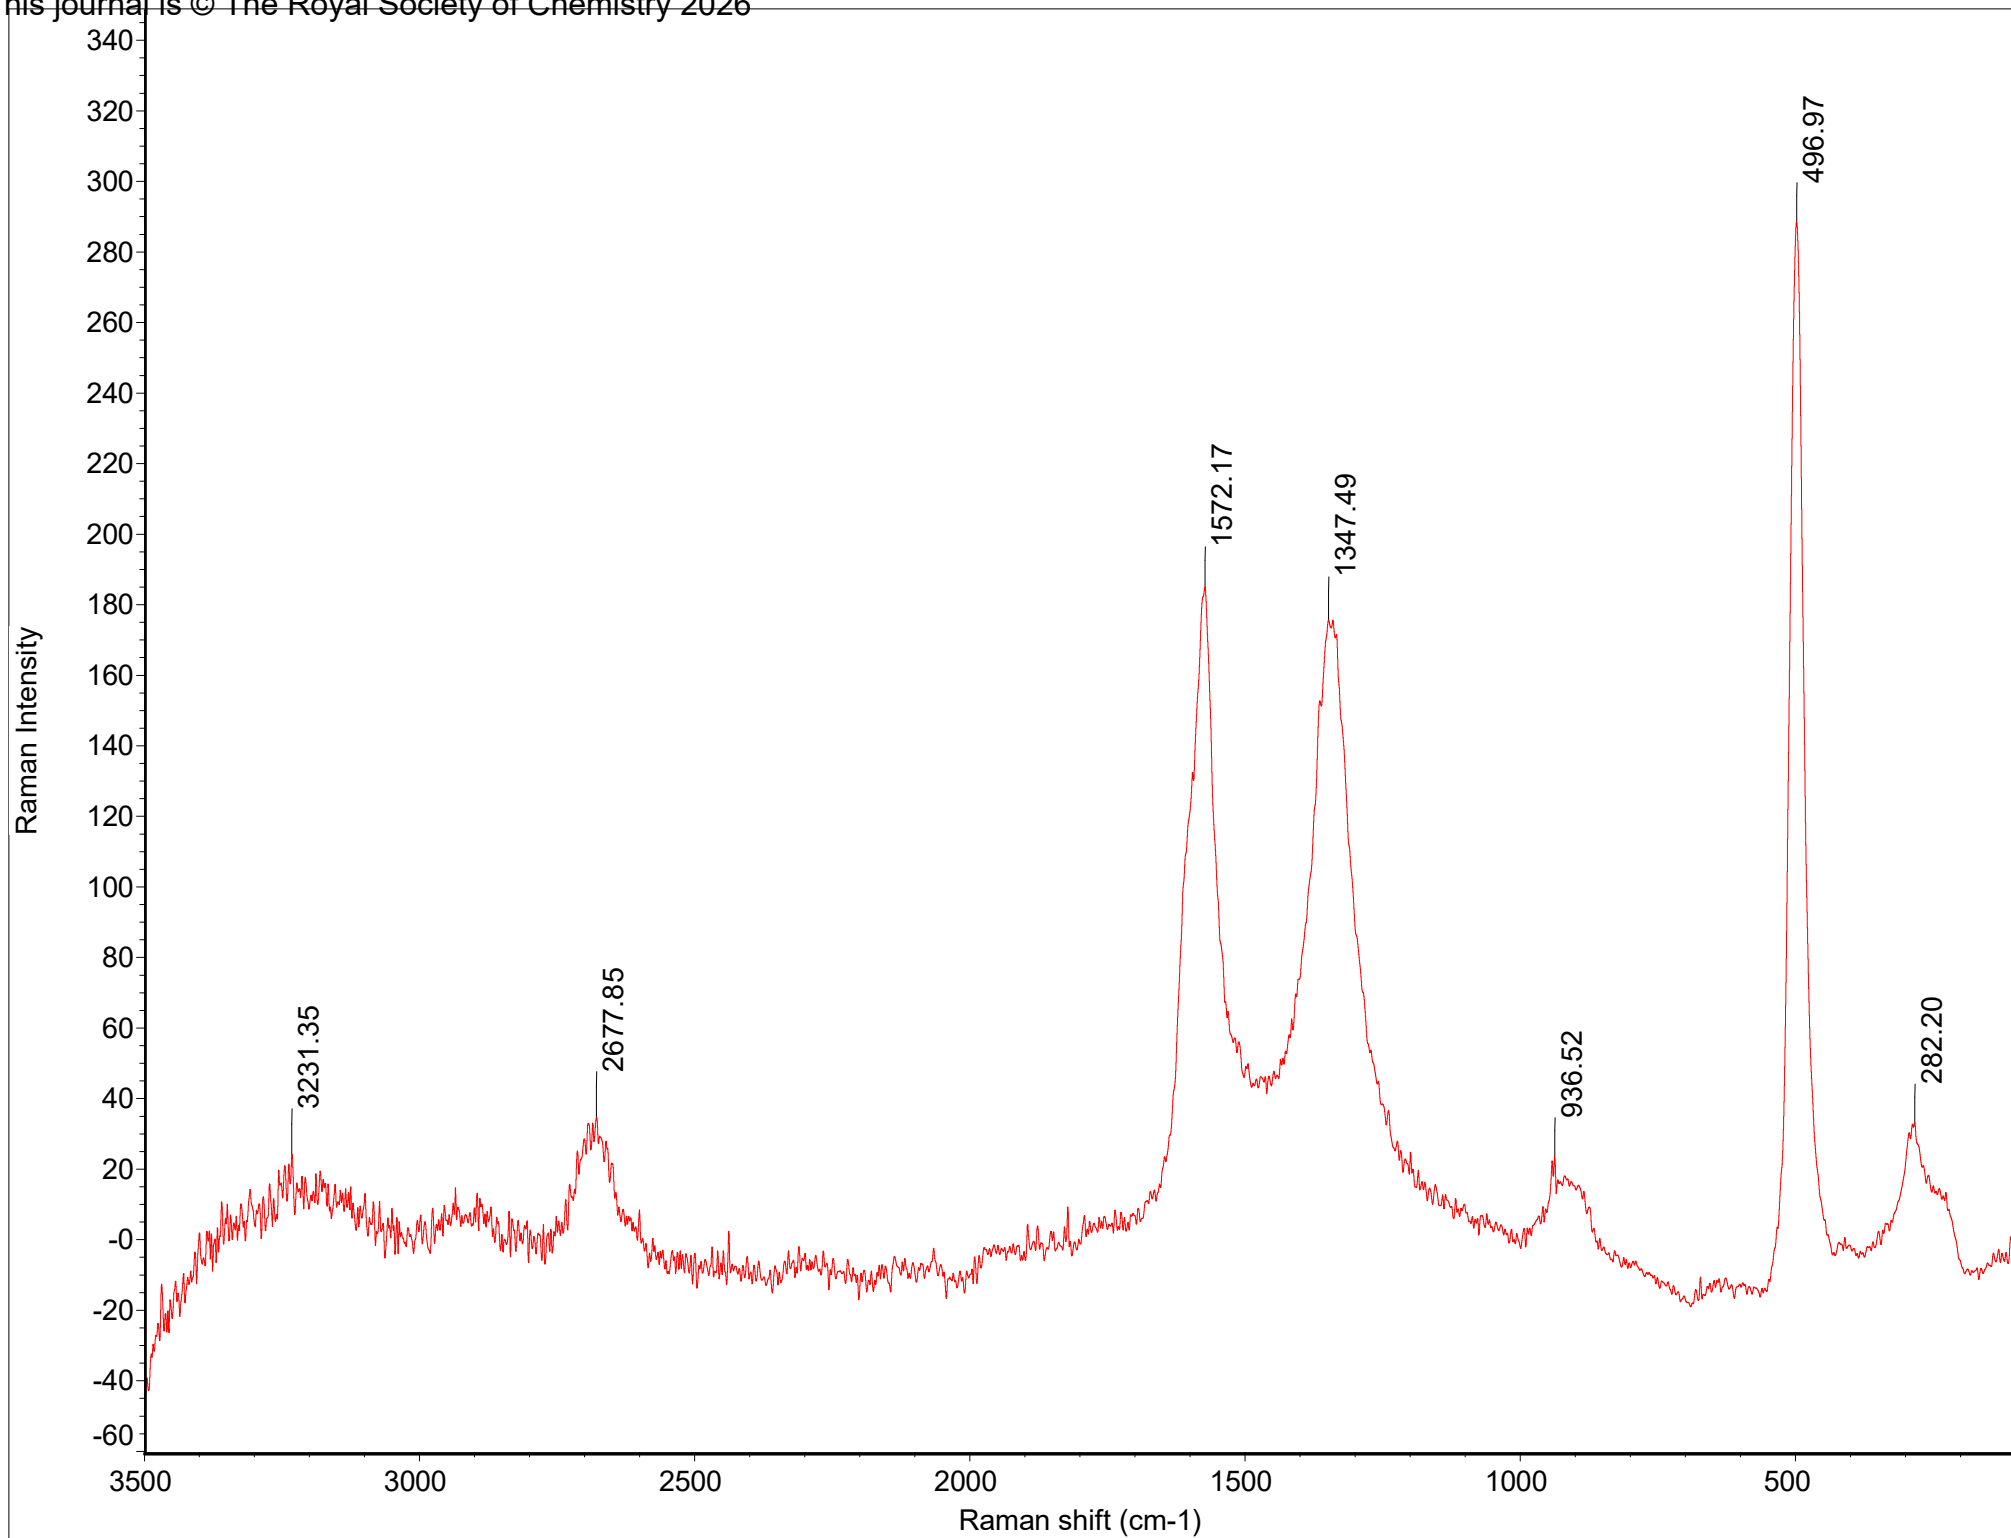

Supplement: d5na01111f4.pdf [file d5na01111f4.pdf]

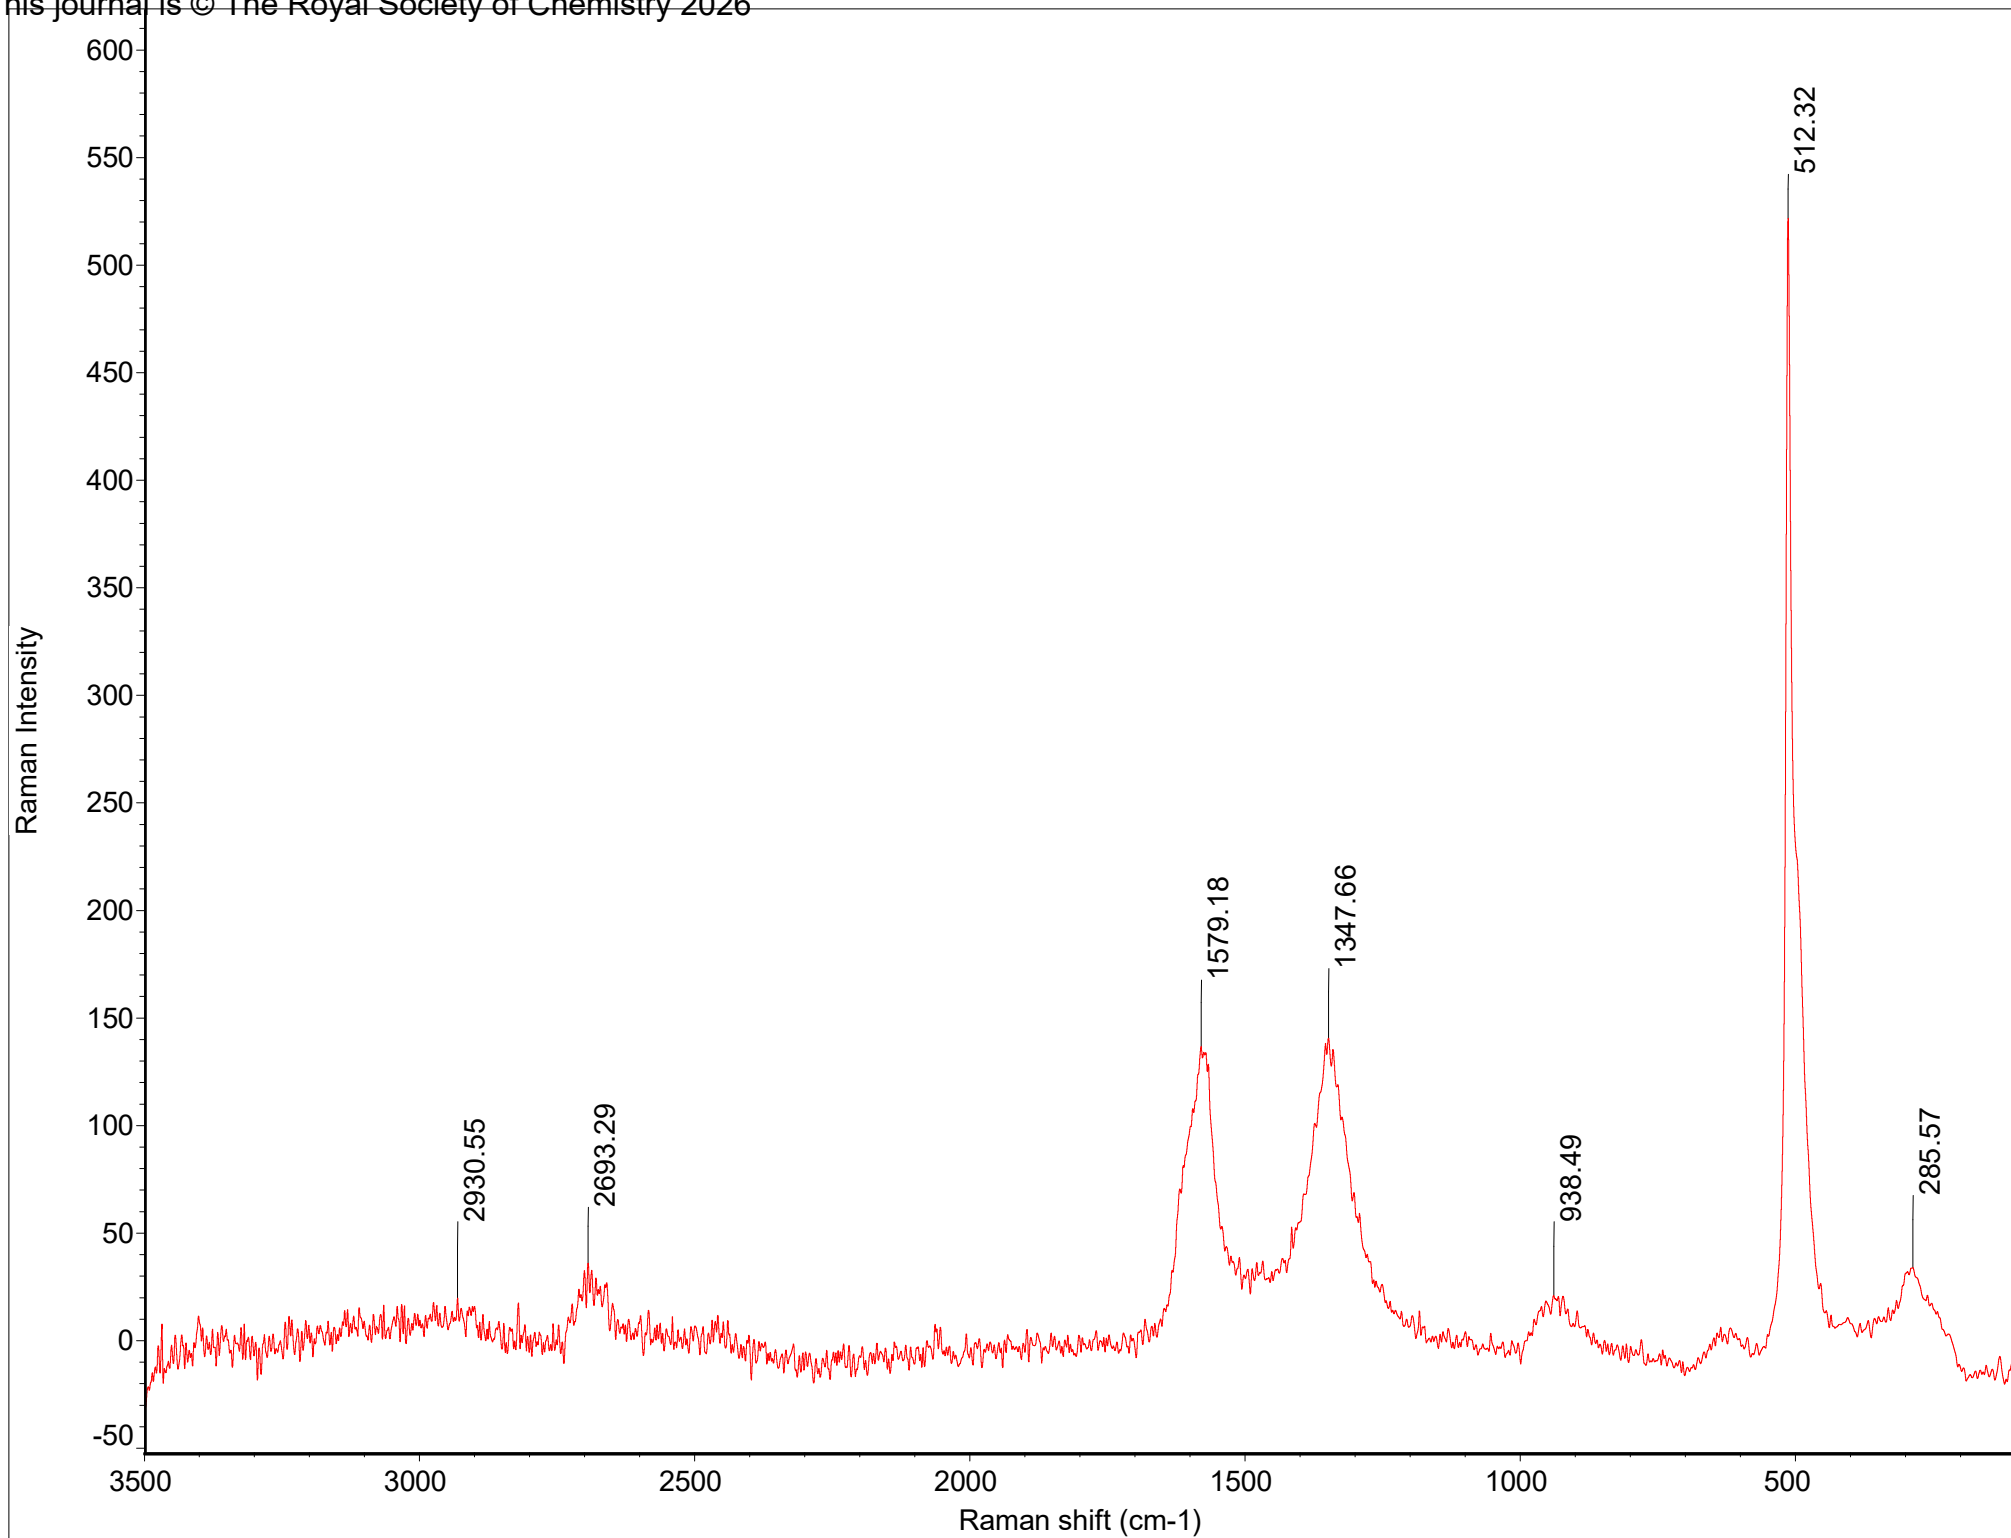

Supplement: d5na01111f6.pdf [file d5na01111f6.pdf]
